# Supplementary material
Source: PubMed Central journal article supplement (PMC3804129)

# Heteroaromatic and aniline derivatives of piperidines as potent ligands for vesicular acetylcholine transporter

Junfeng Li,<sup>a</sup> Xiang Zhang,<sup>a</sup> Zhanbin Zhang,<sup>a</sup> Prashanth K. Padakanti,<sup>a</sup> Hongjun Jin,<sup>a</sup> Jinquan Cui,<sup>a</sup> Aixiao Li,<sup>a</sup> Dexing Zeng,<sup>a</sup> Nigam P. Rath,<sup>b</sup> Hubert Flores,<sup>c</sup> Joel S. Perlmutter,<sup>a,c</sup> Stanley M. Parsons,<sup>d</sup> Zhude Tu.<sup>a\*</sup>

<sup>a</sup>Department of Radiology, Washington University School of Medicine, 510 S. Kingshighway Blvd, St. Louis, MO 63110.

<sup>b</sup>Department of Chemistry and Biochemistry and Center for Nanoscience, University of Missouri - St. Louis,  
One University Boulevard, St. Louis, MO 63121.

<sup>c</sup>Department of Neurology, Washington University School of Medicine, 660 South Euclid, St. Louis, MO 63110

<sup>d</sup>Department of Chemistry and Biochemistry and the Graduate Program in Biomolecular Science and Engineering, University of California, Santa Barbara, CA 93106.

## Contents of Supporting Information:

|                                                        |              |
|--------------------------------------------------------|--------------|
| <b>I. Table 2. Elemental Analysis of New Analogues</b> | <b>S2</b>    |
| <b>II. Tables 3-8. X-ray structure data of 19i</b>     | <b>S3-29</b> |

**Table 2. Elemental Analysis of Analogues**

| Compounds  | Molecular Formulas                                  | Calculated |      |      | Found |      |      |
|------------|-----------------------------------------------------|------------|------|------|-------|------|------|
|            |                                                     | C          | H    | N    | C     | H    | N    |
| <b>19a</b> | $C_{21}H_{26}N_2O_2 \cdot H_2C_2O_4$                | 64.47      | 6.59 | 6.54 | 64.26 | 6.62 | 6.41 |
| <b>19b</b> | $C_{21}H_{26}N_2O_2 \cdot H_2C_2O_4 \cdot 0.25H_2O$ | 63.80      | 6.63 | 6.47 | 63.72 | 6.43 | 6.38 |
| <b>19c</b> | $C_{21}H_{24}N_2O_2 \cdot H_2C_2O_4 \cdot H_2O$     | 62.15      | 6.35 | 6.30 | 62.19 | 6.25 | 6.29 |
| <b>19d</b> | $C_{22}H_{26}N_2O_2 \cdot 2H_2C_2O_4$               | 58.86      | 5.70 | 5.28 | 58.35 | 5.87 | 4.82 |
| <b>19e</b> | $C_{22}H_{26}N_2O_3 \cdot H_2C_2O_4$                | 63.15      | 6.18 | 6.14 | 63.06 | 6.18 | 6.05 |
| <b>19f</b> | $C_{22}H_{26}N_2O_3 \cdot H_2C_2O_4 \cdot 0.25H_2O$ | 62.53      | 6.23 | 6.08 | 62.56 | 6.16 | 6.04 |
| <b>19g</b> | $C_{21}H_{23}FN_2O_2 \cdot H_2C_2O_4$               | 62.15      | 5.67 | 6.30 | 61.87 | 5.53 | 6.26 |
| <b>19h</b> | $C_{22}H_{26}N_2O_3 \cdot H_2C_2O_4 \cdot 1.5H_2O$  | 59.62      | 6.46 | 5.79 | 59.71 | 6.38 | 5.74 |
| <b>19i</b> | $C_{22}H_{26}N_2O_3 \cdot H_2C_2O_4 \cdot 1.5H_2O$  | 59.62      | 6.46 | 5.79 | 60.08 | 6.59 | 5.72 |
| <b>19j</b> | $C_{21}H_{23}FN_2O_2 \cdot H_2C_2O_4 \cdot 0.5H_2O$ | 60.92      | 5.78 | 6.18 | 60.62 | 5.67 | 6.09 |
| <b>19k</b> | $C_{21}H_{23}FN_2O_2 \cdot H_2C_2O_4 \cdot H_2O$    | 59.73      | 5.88 | 6.06 | 59.97 | 5.61 | 5.80 |
| <b>24a</b> | $C_{24}H_{30}N_2O_2 \cdot H_2C_2O_4$                | 66.65      | 6.88 | 5.98 | 66.80 | 6.95 | 5.92 |
| <b>24b</b> | $C_{23}H_{28}N_2O_2 \cdot H_2C_2O_4$                | 66.06      | 6.65 | 6.16 | 65.84 | 6.69 | 6.14 |
| <b>26a</b> | $C_{24}H_{27}FN_2O_3 \cdot H_2C_2O_4 \cdot H_2O$    | 60.22      | 6.03 | 5.40 | 60.72 | 5.98 | 5.50 |
| <b>26b</b> | $C_{23}H_{27}FN_2O_3 \cdot H_2C_2O_4 \cdot H_2O$    | 59.28      | 6.17 | 5.53 | 59.14 | 6.45 | 5.30 |
| <b>30a</b> | $C_{21}H_{27}N_3O_2 \cdot 2H_2C_2O_4 \cdot 2H_2O$   | 52.72      | 6.19 | 7.38 | 52.97 | 5.94 | 7.21 |
| <b>30c</b> | $C_{21}H_{25}N_3O_2 \cdot 2H_2C_2O_4 \cdot 0.5H_2O$ | 55.55      | 5.59 | 7.77 | 55.86 | 5.88 | 8.04 |
| <b>30d</b> | $C_{24}H_{29}N_3O_4 \cdot H_2C_2O_4$                | 60.81      | 6.08 | 8.18 | 60.57 | 6.06 | 7.96 |
| <b>30e</b> | $C_{22}H_{27}N_3O_3 \cdot 2H_2C_2O_4 \cdot 1.5H_2O$ | 53.06      | 5.82 | 7.14 | 52.78 | 5.53 | 6.86 |
| <b>31a</b> | $C_{21}H_{27}N_3O_2 \cdot 2H_2C_2O_4 \cdot 1.5H_2O$ | 53.57      | 6.11 | 7.50 | 53.53 | 6.38 | 7.64 |

## II. X-Ray Diffraction study of 19i.

Crystals of appropriate dimension were obtained by slow evaporation of methanol solutions at 8°C. A crystal with approximate dimensions 0.31 x 0.24 x 0.03 mm<sup>3</sup> was mounted on glass fibers in a random orientation. Preliminary examination and data collection were performed using a Bruker Kappa Apex II Charge Coupled Device (CCD) Detector system single crystal X-Ray diffractometer equipped with an Oxford Cryostream LT device. All data were collected using graphite monochromated Mo K $\alpha$  radiation ( $\lambda = 0.71073 \text{ \AA}$ ) from a fine focus sealed tube X-Ray source. Preliminary unit cell constants were determined with a set of 36 narrow frame scans. Intensity data set included combinations of  $\omega$  and  $\Phi$  scan frames with scan width of 0.5° and counting time of 20 seconds/frame at a crystal to detector distance of 4.0 cm. The collected frames were integrated using an orientation matrix determined from the narrow frame scans. Apex II and SAINT software packages (Bruker Analytical X-Ray, Madison, WI, 2006) were used for data collection and data integration. Analysis of the integrated data did not show any decay. Final cell constants were determined by global refinement of xyz centroids of 1393 reflections from the complete data set. Collected data were corrected for systematic errors using SADABS (Blessing, R. H., *Acta Cryst.* (1995), A51, 33-38) based on the Laue symmetry using equivalent reflections.

Crystal data and intensity data collection parameters are listed in supporting material (Table 3).

Structure solution and refinement were carried out using the SHELXTL- PLUS software package (Sheldrick, G. M., Bruker Analytical X-Ray Division, Madison, WI, 2006). The structure was solved by direct methods and refined successfully in the space group, P21. Full matrix least-squares refinement was carried out by minimizing  $\sum w(F_o^2 - F_c^2)^2$ . The non-hydrogen atoms were refined anisotropically to convergence. All hydrogen atoms were treated using appropriate riding model (AFIX m<sup>3</sup>). The final residual values and structure refinement parameters are available via the Internet with the supporting information (Table 3).

Complete listings of positional and isotropic displacement coefficients for hydrogen atoms, anisotropic displacement coefficients for the non-hydrogen atoms are available via the Internet with the supporting information (Tables 4-8).

Table 3. Crystal data and structure refinement for **19i**.

|                                 |                                                               |                 |
|---------------------------------|---------------------------------------------------------------|-----------------|
| Identification code             | z8611t5/0 °C/smart/TZ-4-1-148                                 |                 |
| Empirical formula               | C <sub>25</sub> H <sub>32</sub> N <sub>2</sub> O <sub>8</sub> |                 |
| Formula weight                  | 488.53                                                        |                 |
| Temperature                     | 272(2) K                                                      |                 |
| Wavelength                      | 0.71073 Å                                                     |                 |
| Crystal system                  | Triclinic                                                     |                 |
| Space group                     | P-1                                                           |                 |
| Unit cell dimensions            | a = 5.6706(2) Å                                               | α = 98.021(3)°. |
|                                 | b = 9.0857(3) Å                                               | β = 96.230(3)°. |
|                                 | c = 25.8454(12) Å                                             | γ = 98.012(2)°. |
| Volume                          | 1294.53(9) Å <sup>3</sup>                                     |                 |
| Z                               | 2                                                             |                 |
| Density (calculated)            | 1.253 Mg/m <sup>3</sup>                                       |                 |
| Absorption coefficient          | 0.094 mm <sup>-1</sup>                                        |                 |
| F(000)                          | 520                                                           |                 |
| Crystal size                    | 0.31 x 0.24 x 0.03 mm <sup>3</sup>                            |                 |
| Theta range for data collection | 1.61 to 25.38°.                                               |                 |
| Index ranges                    | -6 ≤ h ≤ 6, -10 ≤ k ≤ 10, -10 ≤ l ≤ 31                        |                 |
| Reflections collected           | 36759                                                         |                 |
| Independent reflections         | 4672 [R(int) = 0.0650]                                        |                 |
| Completeness to theta = 25.00°  | 98.1 %                                                        |                 |
| Absorption correction           | Semi-empirical from equivalents                               |                 |
| Max. and min. transmission      | 0.9970 and 0.9713                                             |                 |
| Refinement method               | Full-matrix least-squares on F <sup>2</sup>                   |                 |
| Data / restraints / parameters  | 4672 / 20 / 411                                               |                 |

|                                      |                                    |
|--------------------------------------|------------------------------------|
| Goodness-of-fit on $F^2$             | 1.043                              |
| Final R indices [ $I > 2\sigma(I)$ ] | R1 = 0.0637, wR2 = 0.1450          |
| R indices (all data)                 | R1 = 0.1172, wR2 = 0.1723          |
| Largest diff. peak and hole          | 0.446 and -0.200 e.Å <sup>-3</sup> |

Table 4. Atomic coordinates ( $\times 10^4$ ) and equivalent isotropic displacement parameters ( $\text{\AA}^2 \times 10^3$ ) for **19i**.  $U(\text{eq})$  is defined as one third of the trace of the orthogonalized  $U^{ij}$  tensor.

|       | x        | y        | z        | $U(\text{eq})$ |
|-------|----------|----------|----------|----------------|
| O(1)  | 8003(5)  | 7787(3)  | 8213(1)  | 52(1)          |
| O(2)  | -280(8)  | 3170(5)  | 6322(2)  | 103(1)         |
| N(1)  | 4070(5)  | 5345(3)  | 7968(1)  | 33(1)          |
| C(1)  | 2759(11) | 6332(6)  | 9844(2)  | 82(2)          |
| C(2)  | 3381(14) | 7127(8)  | 10359(2) | 103(2)         |
| C(3)  | 5266(14) | 8235(8)  | 10468(2) | 101(2)         |
| C(4)  | 6657(11) | 8550(7)  | 10082(2) | 84(2)          |
| C(5)  | 6096(8)  | 7781(5)  | 9564(2)  | 54(1)          |
| C(6)  | 7592(7)  | 8152(5)  | 9146(2)  | 56(1)          |
| C(7)  | 6389(6)  | 7648(4)  | 8592(2)  | 41(1)          |
| C(8)  | 5199(6)  | 6020(4)  | 8528(2)  | 36(1)          |
| C(9)  | 3349(8)  | 5804(5)  | 8899(2)  | 55(1)          |
| C(10) | 4116(8)  | 6660(5)  | 9450(2)  | 50(1)          |
| C(11) | 5845(6)  | 4823(4)  | 7625(2)  | 36(1)          |
| C(12) | 4574(7)  | 3915(4)  | 7113(2)  | 46(1)          |
| C(13) | 2994(7)  | 4841(5)  | 6812(2)  | 51(1)          |
| C(14) | 1314(7)  | 5467(5)  | 7176(2)  | 48(1)          |
| C(15) | 2627(6)  | 6346(4)  | 7694(2)  | 37(1)          |
| C(16) | 1635(9)  | 3880(6)  | 6332(2)  | 68(1)          |
| O(3)  | 1430(20) | 2271(13) | 4492(3)  | 156(5)         |
| C(17) | 2043(16) | 4337(10) | 5771(3)  | 58(2)          |
| C(18) | 2330(20) | 5768(12) | 5678(4)  | 84(3)          |

|        |          |          |          |         |
|--------|----------|----------|----------|---------|
| C(19)  | 2210(20) | 6036(16) | 5143(6)  | 112(5)  |
| C(20)  | 1910(30) | 4823(19) | 4757(4)  | 108(5)  |
| C(21)  | 1740(20) | 3350(16) | 4850(4)  | 90(4)   |
| N(2)   | 1880(16) | 3173(9)  | 5369(3)  | 71(2)   |
| C(22)  | 1860(60) | 1540(30) | 5485(12) | 140(14) |
| O(3')  | 3250(20) | -249(12) | 5084(5)  | 157(5)  |
| C(17') | 3105(18) | 3144(12) | 5928(4)  | 70(3)   |
| C(18') | 4731(19) | 4135(13) | 5756(4)  | 72(3)   |
| C(19') | 5900(20) | 3643(17) | 5321(5)  | 91(4)   |
| C(20') | 5290(30) | 2176(19) | 5077(5)  | 107(5)  |
| C(21') | 3690(30) | 1113(15) | 5262(5)  | 95(4)   |
| N(2')  | 2610(40) | 1703(19) | 5680(9)  | 94(6)   |
| C(22') | 950(30)  | 519(16)  | 5920(7)  | 139(6)  |
| O(4)   | 2393(8)  | -229(4)  | 8126(6)  | 74(3)   |
| O(4')  | 2270(40) | -70(20)  | 7841(12) | 74(3)   |
| O(5)   | 4372(4)  | 2088(3)  | 8188(1)  | 44(1)   |
| O(6)   | 216(4)   | 3130(3)  | 8054(1)  | 49(1)   |
| O(7)   | -1697(4) | 971(3)   | 8217(1)  | 50(1)   |
| C(23)  | 2430(6)  | 1108(4)  | 8126(2)  | 40(1)   |
| C(24)  | 118(5)   | 1822(4)  | 8131(1)  | 33(1)   |
| C(1S)  | 7680(40) | 9150(20) | 6838(6)  | 179(9)  |
| O(1S)  | 7670(30) | 7706(16) | 6527(6)  | 225(9)  |
| O(1S') | 4560(60) | 8410(30) | 6354(9)  | 360(20) |
| C(1S') | 5760(70) | 9630(40) | 6759(13) | 360(20) |

Table 5. Bond lengths [ $\text{\AA}$ ] and angles [ $^\circ$ ] for **19i**.

---

|            |          |
|------------|----------|
| O(1)-C(7)  | 1.419(4) |
| O(1)-H(1)  | 0.8200   |
| O(2)-C(16) | 1.179(6) |
| N(1)-C(11) | 1.495(4) |
| N(1)-C(15) | 1.503(4) |
| N(1)-C(8)  | 1.525(5) |
| N(1)-H(1B) | 0.9100   |
| C(1)-C(10) | 1.382(6) |
| C(1)-C(2)  | 1.404(9) |
| C(1)-H(1A) | 0.9300   |
| C(2)-C(3)  | 1.339(9) |
| C(2)-H(2A) | 0.9300   |
| C(3)-C(4)  | 1.373(8) |
| C(3)-H(3A) | 0.9300   |
| C(4)-C(5)  | 1.402(7) |
| C(4)-H(4A) | 0.9300   |
| C(5)-C(10) | 1.382(6) |
| C(5)-C(6)  | 1.491(6) |
| C(6)-C(7)  | 1.497(6) |
| C(6)-H(6A) | 0.9700   |
| C(6)-H(6B) | 0.9700   |
| C(7)-C(8)  | 1.517(5) |
| C(7)-H(7A) | 0.9800   |
| C(8)-C(9)  | 1.506(5) |
| C(8)-H(8A) | 0.9800   |



|              |           |
|--------------|-----------|
| C(9)-C(10)   | 1.512(6)  |
| C(9)-H(9A)   | 0.9700    |
| C(9)-H(9B)   | 0.9700    |
| C(11)-C(12)  | 1.506(6)  |
| C(11)-H(11A) | 0.9700    |
| C(11)-H(11B) | 0.9700    |
| C(12)-C(13)  | 1.536(6)  |
| C(12)-H(12A) | 0.9700    |
| C(12)-H(12B) | 0.9700    |
| C(13)-C(16)  | 1.482(7)  |
| C(13)-C(14)  | 1.521(5)  |
| C(13)-H(13A) | 0.9800    |
| C(14)-C(15)  | 1.518(6)  |
| C(14)-H(14A) | 0.9700    |
| C(14)-H(14B) | 0.9700    |
| C(15)-H(15A) | 0.9700    |
| C(15)-H(15B) | 0.9700    |
| C(16)-C(17') | 1.544(11) |
| C(16)-C(17)  | 1.594(10) |
| O(3)-C(21)   | 1.230(13) |
| C(17)-C(18)  | 1.346(12) |
| C(17)-N(2)   | 1.361(11) |
| C(18)-C(19)  | 1.433(14) |
| C(18)-H(18A) | 0.9300    |
| C(19)-C(20)  | 1.358(15) |
| C(19)-H(19A) | 0.9300    |
| C(20)-C(21)  | 1.384(16) |

|               |           |
|---------------|-----------|
| C(20)-H(20A)  | 0.9300    |
| C(21)-N(2)    | 1.369(12) |
| N(2)-C(22)    | 1.55(3)   |
| C(22)-H(22A)  | 0.9600    |
| C(22)-H(22B)  | 0.9600    |
| C(22)-H(22C)  | 0.9600    |
| O(3')-C(21')  | 1.238(13) |
| C(17')-N(2')  | 1.352(16) |
| C(17')-C(18') | 1.352(13) |
| C(18')-C(19') | 1.414(13) |
| C(18')-H(18C) | 0.9300    |
| C(19')-C(20') | 1.372(16) |
| C(19')-H(19B) | 0.9300    |
| C(20')-C(21') | 1.401(16) |
| C(20')-H(20B) | 0.9300    |
| C(21')-N(2')  | 1.382(18) |
| N(2')-C(22')  | 1.57(3)   |
| C(22')-H(22D) | 0.9600    |
| C(22')-H(22E) | 0.9600    |
| C(22')-H(22F) | 0.9600    |
| O(4)-C(23)    | 1.212(6)  |
| O(4')-C(23)   | 1.200(16) |
| O(5)-C(23)    | 1.296(4)  |
| O(5)-H(5)     | 0.8200    |
| O(6)-C(24)    | 1.226(4)  |
| O(7)-C(24)    | 1.259(4)  |
| C(23)-C(24)   | 1.542(5)  |

|                  |           |
|------------------|-----------|
| C(1S)-O(1S)      | 1.435(17) |
| C(1S)-H(1S1)     | 0.9600    |
| C(1S)-H(1S2)     | 0.9600    |
| C(1S)-H(1S3)     | 0.9600    |
| O(1S)-H(1S)      | 0.8200    |
| O(1S')-C(1S')    | 1.45(3)   |
| O(1S')-H(1S')    | 0.8200    |
| C(1S')-H(1S4)    | 0.9600    |
| C(1S')-H(1S5)    | 0.9600    |
| C(1S')-H(1S6)    | 0.9600    |
| <br>             |           |
| C(7)-O(1)-H(1)   | 109.5     |
| C(11)-N(1)-C(15) | 109.3(3)  |
| C(11)-N(1)-C(8)  | 113.3(3)  |
| C(15)-N(1)-C(8)  | 114.4(3)  |
| C(11)-N(1)-H(1B) | 106.4     |
| C(15)-N(1)-H(1B) | 106.4     |
| C(8)-N(1)-H(1B)  | 106.4     |
| C(10)-C(1)-C(2)  | 120.5(6)  |
| C(10)-C(1)-H(1A) | 119.8     |
| C(2)-C(1)-H(1A)  | 119.8     |
| C(3)-C(2)-C(1)   | 120.1(6)  |
| C(3)-C(2)-H(2A)  | 120.0     |
| C(1)-C(2)-H(2A)  | 120.0     |
| C(2)-C(3)-C(4)   | 119.9(6)  |
| C(2)-C(3)-H(3A)  | 120.0     |
| C(4)-C(3)-H(3A)  | 120.0     |

|                  |          |
|------------------|----------|
| C(3)-C(4)-C(5)   | 121.6(6) |
| C(3)-C(4)-H(4A)  | 119.2    |
| C(5)-C(4)-H(4A)  | 119.2    |
| C(10)-C(5)-C(4)  | 118.2(4) |
| C(10)-C(5)-C(6)  | 120.6(4) |
| C(4)-C(5)-C(6)   | 121.2(4) |
| C(5)-C(6)-C(7)   | 115.2(3) |
| C(5)-C(6)-H(6A)  | 108.5    |
| C(7)-C(6)-H(6A)  | 108.5    |
| C(5)-C(6)-H(6B)  | 108.5    |
| C(7)-C(6)-H(6B)  | 108.5    |
| H(6A)-C(6)-H(6B) | 107.5    |
| O(1)-C(7)-C(6)   | 112.8(3) |
| O(1)-C(7)-C(8)   | 108.9(3) |
| C(6)-C(7)-C(8)   | 109.8(3) |
| O(1)-C(7)-H(7A)  | 108.4    |
| C(6)-C(7)-H(7A)  | 108.4    |
| C(8)-C(7)-H(7A)  | 108.4    |
| C(9)-C(8)-C(7)   | 111.8(3) |
| C(9)-C(8)-N(1)   | 109.2(3) |
| C(7)-C(8)-N(1)   | 114.5(3) |
| C(9)-C(8)-H(8A)  | 107.0    |
| C(7)-C(8)-H(8A)  | 107.0    |
| N(1)-C(8)-H(8A)  | 107.0    |
| C(8)-C(9)-C(10)  | 114.2(3) |
| C(8)-C(9)-H(9A)  | 108.7    |
| C(10)-C(9)-H(9A) | 108.7    |

|                     |          |
|---------------------|----------|
| C(8)-C(9)-H(9B)     | 108.7    |
| C(10)-C(9)-H(9B)    | 108.7    |
| H(9A)-C(9)-H(9B)    | 107.6    |
| C(1)-C(10)-C(5)     | 119.6(4) |
| C(1)-C(10)-C(9)     | 118.8(4) |
| C(5)-C(10)-C(9)     | 121.6(4) |
| N(1)-C(11)-C(12)    | 110.6(3) |
| N(1)-C(11)-H(11A)   | 109.5    |
| C(12)-C(11)-H(11A)  | 109.5    |
| N(1)-C(11)-H(11B)   | 109.5    |
| C(12)-C(11)-H(11B)  | 109.5    |
| H(11A)-C(11)-H(11B) | 108.1    |
| C(11)-C(12)-C(13)   | 111.2(3) |
| C(11)-C(12)-H(12A)  | 109.4    |
| C(13)-C(12)-H(12A)  | 109.4    |
| C(11)-C(12)-H(12B)  | 109.4    |
| C(13)-C(12)-H(12B)  | 109.4    |
| H(12A)-C(12)-H(12B) | 108.0    |
| C(16)-C(13)-C(14)   | 111.4(4) |
| C(16)-C(13)-C(12)   | 109.7(4) |
| C(14)-C(13)-C(12)   | 108.5(3) |
| C(16)-C(13)-H(13A)  | 109.1    |
| C(14)-C(13)-H(13A)  | 109.1    |
| C(12)-C(13)-H(13A)  | 109.1    |
| C(15)-C(14)-C(13)   | 113.1(3) |
| C(15)-C(14)-H(14A)  | 109.0    |
| C(13)-C(14)-H(14A)  | 109.0    |

|                     |           |
|---------------------|-----------|
| C(15)-C(14)-H(14B)  | 109.0     |
| C(13)-C(14)-H(14B)  | 109.0     |
| H(14A)-C(14)-H(14B) | 107.8     |
| N(1)-C(15)-C(14)    | 109.2(3)  |
| N(1)-C(15)-H(15A)   | 109.8     |
| C(14)-C(15)-H(15A)  | 109.8     |
| N(1)-C(15)-H(15B)   | 109.8     |
| C(14)-C(15)-H(15B)  | 109.8     |
| H(15A)-C(15)-H(15B) | 108.3     |
| O(2)-C(16)-C(13)    | 123.7(5)  |
| O(2)-C(16)-C(17')   | 112.3(6)  |
| C(13)-C(16)-C(17')  | 117.3(5)  |
| O(2)-C(16)-C(17)    | 111.7(5)  |
| C(13)-C(16)-C(17)   | 118.7(5)  |
| C(17')-C(16)-C(17)  | 52.9(5)   |
| C(18)-C(17)-N(2)    | 120.5(8)  |
| C(18)-C(17)-C(16)   | 123.6(8)  |
| N(2)-C(17)-C(16)    | 115.7(7)  |
| C(17)-C(18)-C(19)   | 118.8(10) |
| C(17)-C(18)-H(18A)  | 120.6     |
| C(19)-C(18)-H(18A)  | 120.6     |
| C(20)-C(19)-C(18)   | 117.7(11) |
| C(20)-C(19)-H(19A)  | 121.1     |
| C(18)-C(19)-H(19A)  | 121.1     |
| C(19)-C(20)-C(21)   | 123.9(10) |
| C(19)-C(20)-H(20A)  | 118.0     |
| C(21)-C(20)-H(20A)  | 118.0     |

|                      |           |
|----------------------|-----------|
| O(3)-C(21)-N(2)      | 122.1(12) |
| O(3)-C(21)-C(20)     | 122.5(10) |
| N(2)-C(21)-C(20)     | 115.4(10) |
| C(17)-N(2)-C(21)     | 123.3(9)  |
| C(17)-N(2)-C(22)     | 120.5(13) |
| C(21)-N(2)-C(22)     | 116.2(13) |
| N(2')-C(17')-C(18')  | 119.5(12) |
| N(2')-C(17')-C(16)   | 125.4(11) |
| C(18')-C(17')-C(16)  | 114.0(9)  |
| C(17')-C(18')-C(19') | 119.4(11) |
| C(17')-C(18')-H(18C) | 120.3     |
| C(19')-C(18')-H(18C) | 120.3     |
| C(20')-C(19')-C(18') | 118.8(12) |
| C(20')-C(19')-H(19B) | 120.6     |
| C(18')-C(19')-H(19B) | 120.6     |
| C(19')-C(20')-C(21') | 122.8(11) |
| C(19')-C(20')-H(20B) | 118.6     |
| C(21')-C(20')-H(20B) | 118.6     |
| O(3')-C(21')-N(2')   | 120.7(14) |
| O(3')-C(21')-C(20')  | 125.3(12) |
| N(2')-C(21')-C(20')  | 114.0(12) |
| C(17')-N(2')-C(21')  | 125.2(16) |
| C(17')-N(2')-C(22')  | 119.2(14) |
| C(21')-N(2')-C(22')  | 115.0(13) |
| N(2')-C(22')-H(22D)  | 109.5     |
| N(2')-C(22')-H(22E)  | 109.5     |
| H(22D)-C(22')-H(22E) | 109.5     |

|                      |           |
|----------------------|-----------|
| N(2')-C(22')-H(22F)  | 109.5     |
| H(22D)-C(22')-H(22F) | 109.5     |
| H(22E)-C(22')-H(22F) | 109.5     |
| C(23)-O(5)-H(5)      | 109.5     |
| O(4')-C(23)-O(4)     | 37.1(12)  |
| O(4')-C(23)-O(5)     | 120.6(12) |
| O(4)-C(23)-O(5)      | 124.4(4)  |
| O(4')-C(23)-C(24)    | 116.1(12) |
| O(4)-C(23)-C(24)     | 121.6(3)  |
| O(5)-C(23)-C(24)     | 113.5(3)  |
| O(6)-C(24)-O(7)      | 126.8(3)  |
| O(6)-C(24)-C(23)     | 118.3(3)  |
| O(7)-C(24)-C(23)     | 114.9(3)  |
| O(1S)-C(1S)-H(1S1)   | 109.5     |
| O(1S)-C(1S)-H(1S2)   | 109.5     |
| H(1S1)-C(1S)-H(1S2)  | 109.5     |
| O(1S)-C(1S)-H(1S3)   | 109.5     |
| H(1S1)-C(1S)-H(1S3)  | 109.5     |
| H(1S2)-C(1S)-H(1S3)  | 109.5     |
| C(1S)-O(1S)-H(1S)    | 109.5     |
| C(1S')-O(1S')-H(1S') | 109.5     |
| O(1S')-C(1S')-H(1S4) | 109.5     |
| O(1S')-C(1S')-H(1S5) | 109.5     |
| H(1S4)-C(1S')-H(1S5) | 109.5     |
| O(1S')-C(1S')-H(1S6) | 109.5     |
| H(1S4)-C(1S')-H(1S6) | 109.5     |
| H(1S5)-C(1S')-H(1S6) | 109.5     |



Table 6. Anisotropic displacement parameters ( $\text{\AA}^2 \times 10^3$ ) for **19i**. The anisotropic displacement factor exponent takes the form:  $-2\pi^2 [ h^2 a^{*2} U^{11} + \dots + 2 h k a^* b^* U^{12} ]$

|       | $U^{11}$ | $U^{22}$ | $U^{33}$ | $U^{23}$ | $U^{13}$ | $U^{12}$ |
|-------|----------|----------|----------|----------|----------|----------|
| O(1)  | 52(2)    | 31(1)    | 72(2)    | 8(1)     | 26(2)    | -6(1)    |
| O(2)  | 97(3)    | 125(3)   | 64(2)    | -19(2)   | 18(2)    | -36(2)   |
| N(1)  | 27(2)    | 26(1)    | 47(2)    | 9(1)     | 11(1)    | 2(1)     |
| C(1)  | 101(4)   | 93(4)    | 53(3)    | 15(3)    | 29(3)    | -1(3)    |
| C(2)  | 143(6)   | 122(6)   | 49(3)    | 23(4)    | 32(4)    | 20(5)    |
| C(3)  | 150(7)   | 96(5)    | 50(4)    | 4(3)     | 4(4)     | 16(4)    |
| C(4)  | 100(4)   | 87(4)    | 54(3)    | -3(3)    | -4(3)    | -2(3)    |
| C(5)  | 64(3)    | 48(2)    | 48(3)    | 5(2)     | -1(2)    | 14(2)    |
| C(6)  | 48(3)    | 48(2)    | 63(3)    | -2(2)    | -1(2)    | -4(2)    |
| C(7)  | 35(2)    | 32(2)    | 55(3)    | 10(2)    | 10(2)    | 1(2)     |
| C(8)  | 33(2)    | 33(2)    | 41(2)    | 9(2)     | 6(2)     | -1(1)    |
| C(9)  | 53(2)    | 58(3)    | 52(3)    | 13(2)    | 17(2)    | -8(2)    |
| C(10) | 51(2)    | 55(2)    | 45(3)    | 9(2)     | 5(2)     | 8(2)     |
| C(11) | 26(2)    | 30(2)    | 55(2)    | 9(2)     | 12(2)    | 6(1)     |
| C(12) | 37(2)    | 50(2)    | 52(3)    | 0(2)     | 17(2)    | 8(2)     |
| C(13) | 46(2)    | 61(3)    | 47(3)    | 1(2)     | 14(2)    | 8(2)     |
| C(14) | 39(2)    | 57(3)    | 51(3)    | 12(2)    | 8(2)     | 16(2)    |
| C(15) | 31(2)    | 35(2)    | 49(2)    | 7(2)     | 11(2)    | 12(2)    |
| C(16) | 62(3)    | 87(4)    | 52(3)    | 1(3)     | 9(3)     | 3(3)     |
| O(3)  | 246(14)  | 164(10)  | 55(5)    | -14(6)   | 38(7)    | 43(9)    |

|        |         |         |         |         |         |         |
|--------|---------|---------|---------|---------|---------|---------|
| C(17)  | 66(6)   | 65(6)   | 46(5)   | 8(5)    | 7(4)    | 22(5)   |
| C(18)  | 113(9)  | 82(8)   | 66(7)   | 29(6)   | 8(6)    | 25(6)   |
| C(19)  | 127(12) | 117(11) | 113(12) | 65(10)  | 28(10)  | 33(9)   |
| C(20)  | 133(12) | 165(15) | 39(6)   | 28(8)   | 20(7)   | 53(10)  |
| C(21)  | 112(10) | 121(10) | 50(7)   | 29(8)   | 27(7)   | 33(8)   |
| N(2)   | 101(6)  | 69(5)   | 47(5)   | 8(4)    | 13(4)   | 32(4)   |
| C(22)  | 180(30) | 92(15)  | 150(30) | -8(15)  | 40(20)  | 24(16)  |
| O(3')  | 197(11) | 111(8)  | 152(10) | -54(8)  | 28(8)   | 53(8)   |
| C(17') | 74(7)   | 98(9)   | 45(6)   | 22(6)   | 4(5)    | 26(6)   |
| C(18') | 82(7)   | 97(8)   | 45(6)   | 9(6)    | 23(6)   | 33(6)   |
| C(19') | 93(9)   | 128(12) | 61(7)   | 21(8)   | 22(7)   | 39(8)   |
| C(20') | 101(11) | 152(14) | 74(9)   | -2(10)  | 22(8)   | 50(10)  |
| C(21') | 109(11) | 102(11) | 79(9)   | -10(8)  | 14(8)   | 60(9)   |
| N(2')  | 103(11) | 60(8)   | 116(14) | -23(8)  | 31(11)  | 28(7)   |
| C(22') | 162(15) | 96(11)  | 150(15) | 4(11)   | 41(12)  | -8(10)  |
| O(4)   | 31(2)   | 24(2)   | 172(9)  | 37(3)   | 8(3)    | 9(1)    |
| O(4')  | 31(2)   | 24(2)   | 172(9)  | 37(3)   | 8(3)    | 9(1)    |
| O(5)   | 17(1)   | 35(1)   | 81(2)   | 12(1)   | 8(1)    | 4(1)    |
| O(6)   | 25(1)   | 30(1)   | 97(2)   | 24(1)   | 8(1)    | 7(1)    |
| O(7)   | 22(1)   | 37(1)   | 97(2)   | 26(2)   | 14(1)   | 4(1)    |
| C(23)  | 22(2)   | 30(2)   | 71(3)   | 11(2)   | 8(2)    | 2(1)    |
| C(24)  | 23(2)   | 26(2)   | 52(2)   | 11(2)   | 4(2)    | 5(1)    |
| C(1S)  | 220(20) | 170(17) | 92(11)  | -81(11) | -14(12) | -17(14) |
| O(1S)  | 360(30) | 156(12) | 174(13) | 51(10)  | 29(14)  | 63(13)  |
| O(1S') | 600(50) | 460(40) | 190(20) | 140(20) | 220(30) | 400(40) |
| C(1S') | 600(50) | 460(40) | 190(20) | 140(20) | 220(30) | 400(40) |

---

Table 7. Hydrogen coordinates ( $\times 10^4$ ) and isotropic displacement parameters ( $\text{\AA}^2 \times 10^{-3}$ )

for **19i**.

|        | x    | y    | z     | U(eq) |
|--------|------|------|-------|-------|
| H(1)   | 8567 | 8676 | 8228  | 77    |
| H(1B)  | 3024 | 4511 | 7994  | 40    |
| H(1A)  | 1425 | 5579 | 9768  | 99    |
| H(2A)  | 2482 | 6882 | 10624 | 123   |
| H(3A)  | 5634 | 8791 | 10805 | 121   |
| H(4A)  | 8005 | 9291 | 10166 | 101   |
| H(6A)  | 9035 | 7697 | 9190  | 67    |
| H(6B)  | 8084 | 9234 | 9197  | 67    |
| H(7A)  | 5142 | 8269 | 8524  | 49    |
| H(8A)  | 6457 | 5433 | 8625  | 43    |
| H(9A)  | 2983 | 4740 | 8919  | 66    |
| H(9B)  | 1886 | 6120 | 8753  | 66    |
| H(11A) | 6827 | 4213 | 7807  | 43    |
| H(11B) | 6894 | 5687 | 7552  | 43    |
| H(12A) | 3582 | 3027 | 7186  | 55    |
| H(12B) | 5753 | 3585 | 6897  | 55    |
| H(13A) | 4024 | 5679 | 6708  | 62    |
| H(14A) | 403  | 6120 | 6998  | 57    |
| H(14B) | 184  | 4641 | 7249  | 57    |
| H(15A) | 3683 | 7217 | 7629  | 45    |

|        |      |       |      |     |
|--------|------|-------|------|-----|
| H(15B) | 1478 | 6696  | 7916 | 45  |
| H(18A) | 2608 | 6567  | 5955 | 101 |
| H(19A) | 2328 | 7008  | 5063 | 135 |
| H(20A) | 1821 | 4991  | 4409 | 129 |
| H(22A) | 3104 | 1526  | 5766 | 210 |
| H(22B) | 2121 | 902   | 5174 | 210 |
| H(22C) | 327  | 1173  | 5586 | 210 |
| H(18C) | 5080 | 5131  | 5921 | 86  |
| H(19B) | 7048 | 4302  | 5203 | 109 |
| H(20B) | 5978 | 1875  | 4777 | 129 |
| H(22D) | -608 | 303   | 5716 | 208 |
| H(22E) | 810  | 917   | 6277 | 208 |
| H(22F) | 1643 | -389  | 5914 | 208 |
| H(5)   | 5547 | 1656  | 8211 | 66  |
| H(1S1) | 7959 | 9066  | 7205 | 268 |
| H(1S2) | 6164 | 9474  | 6762 | 268 |
| H(1S3) | 8940 | 9864  | 6754 | 268 |
| H(1S)  | 7730 | 7808  | 6218 | 338 |
| H(1S') | 3136 | 8227  | 6392 | 546 |
| H(1S4) | 6337 | 10481 | 6597 | 546 |
| H(1S5) | 7090 | 9314  | 6952 | 546 |
| H(1S6) | 4649 | 9918  | 6995 | 546 |

---

Table 8. Torsion angles [°] for **19i**.

---

|                      |           |
|----------------------|-----------|
| C(10)-C(1)-C(2)-C(3) | 1.6(10)   |
| C(1)-C(2)-C(3)-C(4)  | -2.9(11)  |
| C(2)-C(3)-C(4)-C(5)  | 2.9(10)   |
| C(3)-C(4)-C(5)-C(10) | -1.4(8)   |
| C(3)-C(4)-C(5)-C(6)  | 178.8(5)  |
| C(10)-C(5)-C(6)-C(7) | 20.0(6)   |
| C(4)-C(5)-C(6)-C(7)  | -160.3(4) |
| C(5)-C(6)-C(7)-O(1)  | -169.5(3) |
| C(5)-C(6)-C(7)-C(8)  | -47.9(5)  |
| O(1)-C(7)-C(8)-C(9)  | -176.7(3) |
| C(6)-C(7)-C(8)-C(9)  | 59.4(4)   |
| O(1)-C(7)-C(8)-N(1)  | -51.8(4)  |
| C(6)-C(7)-C(8)-N(1)  | -175.7(3) |
| C(11)-N(1)-C(8)-C(9) | -152.2(3) |
| C(15)-N(1)-C(8)-C(9) | 81.6(4)   |
| C(11)-N(1)-C(8)-C(7) | 81.5(4)   |
| C(15)-N(1)-C(8)-C(7) | -44.7(4)  |
| C(7)-C(8)-C(9)-C(10) | -42.1(5)  |
| N(1)-C(8)-C(9)-C(10) | -169.9(3) |
| C(2)-C(1)-C(10)-C(5) | -0.1(8)   |
| C(2)-C(1)-C(10)-C(9) | -178.5(5) |
| C(4)-C(5)-C(10)-C(1) | 0.1(7)    |
| C(6)-C(5)-C(10)-C(1) | 179.8(5)  |
| C(4)-C(5)-C(10)-C(9) | 178.4(4)  |
| C(6)-C(5)-C(10)-C(9) | -1.8(6)   |

|                          |            |
|--------------------------|------------|
| C(8)-C(9)-C(10)-C(1)     | -168.3(4)  |
| C(8)-C(9)-C(10)-C(5)     | 13.4(6)    |
| C(15)-N(1)-C(11)-C(12)   | -61.7(4)   |
| C(8)-N(1)-C(11)-C(12)    | 169.4(3)   |
| N(1)-C(11)-C(12)-C(13)   | 59.2(4)    |
| C(11)-C(12)-C(13)-C(16)  | -175.8(4)  |
| C(11)-C(12)-C(13)-C(14)  | -53.9(4)   |
| C(16)-C(13)-C(14)-C(15)  | 174.9(4)   |
| C(12)-C(13)-C(14)-C(15)  | 54.1(5)    |
| C(11)-N(1)-C(15)-C(14)   | 59.9(4)    |
| C(8)-N(1)-C(15)-C(14)    | -171.9(3)  |
| C(13)-C(14)-C(15)-N(1)   | -57.9(4)   |
| C(14)-C(13)-C(16)-O(2)   | -30.3(7)   |
| C(12)-C(13)-C(16)-O(2)   | 89.9(6)    |
| C(14)-C(13)-C(16)-C(17') | -179.1(6)  |
| C(12)-C(13)-C(16)-C(17') | -59.0(7)   |
| C(14)-C(13)-C(16)-C(17)  | 120.3(5)   |
| C(12)-C(13)-C(16)-C(17)  | -119.5(5)  |
| O(2)-C(16)-C(17)-C(18)   | 115.0(10)  |
| C(13)-C(16)-C(17)-C(18)  | -38.9(12)  |
| C(17')-C(16)-C(17)-C(18) | -142.9(12) |
| O(2)-C(16)-C(17)-N(2)    | -59.6(9)   |
| C(13)-C(16)-C(17)-N(2)   | 146.5(7)   |
| C(17')-C(16)-C(17)-N(2)  | 42.5(8)    |
| N(2)-C(17)-C(18)-C(19)   | 6.6(16)    |
| C(16)-C(17)-C(18)-C(19)  | -167.7(9)  |
| C(17)-C(18)-C(19)-C(20)  | -3.0(19)   |

|                             |            |
|-----------------------------|------------|
| C(18)-C(19)-C(20)-C(21)     | 0(2)       |
| C(19)-C(20)-C(21)-O(3)      | 178.8(15)  |
| C(19)-C(20)-C(21)-N(2)      | 0(2)       |
| C(18)-C(17)-N(2)-C(21)      | -7.1(16)   |
| C(16)-C(17)-N(2)-C(21)      | 167.7(9)   |
| C(18)-C(17)-N(2)-C(22)      | 172.6(17)  |
| C(16)-C(17)-N(2)-C(22)      | -12.7(18)  |
| O(3)-C(21)-N(2)-C(17)       | -175.1(12) |
| C(20)-C(21)-N(2)-C(17)      | 3.5(17)    |
| O(3)-C(21)-N(2)-C(22)       | 5(2)       |
| C(20)-C(21)-N(2)-C(22)      | -176.2(17) |
| O(2)-C(16)-C(17')-N(2')     | -15.9(17)  |
| C(13)-C(16)-C(17')-N(2')    | 136.4(15)  |
| C(17)-C(16)-C(17')-N(2')    | -116.9(17) |
| O(2)-C(16)-C(17')-C(18')    | 152.1(8)   |
| C(13)-C(16)-C(17')-C(18')   | -55.5(10)  |
| C(17)-C(16)-C(17')-C(18')   | 51.1(8)    |
| N(2')-C(17)-C(18')-C(19')   | 0(2)       |
| C(16)-C(17')-C(18')-C(19')  | -169.2(9)  |
| C(17')-C(18')-C(19')-C(20') | 1.6(17)    |
| C(18')-C(19')-C(20')-C(21') | -4(2)      |
| C(19')-C(20')-C(21')-O(3')  | -173.4(14) |
| C(19')-C(20')-C(21')-N(2')  | 6(2)       |
| C(18')-C(17')-N(2')-C(21')  | 2(3)       |
| C(16)-C(17')-N(2')-C(21')   | 169.4(16)  |
| C(18')-C(17')-N(2')-C(22')  | 173.0(15)  |
| C(16)-C(17')-N(2')-C(22')   | -20(3)     |

|                            |            |
|----------------------------|------------|
| O(3')-C(21')-N(2')-C(17')  | 174.6(18)  |
| C(20')-C(21')-N(2')-C(17') | -4(3)      |
| O(3')-C(21')-N(2')-C(22')  | 3(3)       |
| C(20')-C(21')-N(2')-C(22') | -175.7(16) |
| O(4')-C(23)-C(24)-O(6)     | -127.7(18) |
| O(4)-C(23)-C(24)-O(6)      | -169.8(9)  |
| O(5)-C(23)-C(24)-O(6)      | 18.4(6)    |
| O(4')-C(23)-C(24)-O(7)     | 52.6(19)   |
| O(4)-C(23)-C(24)-O(7)      | 10.5(10)   |
| O(5)-C(23)-C(24)-O(7)      | -161.3(3)  |

---



Projection view with 30% thermal ellipsoids- disorder components omitted for clarity:

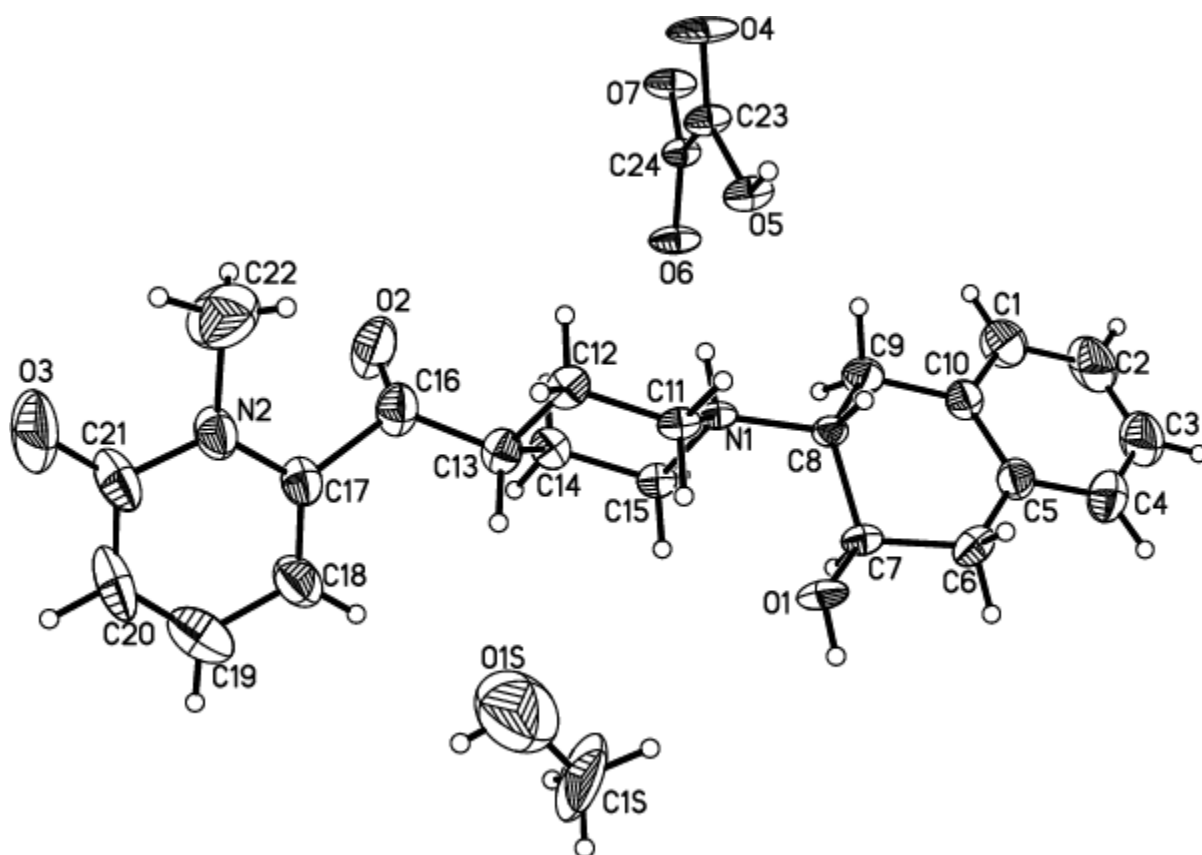

Supplement: NIHMS506620-supplement-1_si_001.pdf [file NIHMS506620-supplement-1_si_001.pdf]
